# Supplementary material
Source: PubMed Central journal article supplement (PMC9233141)
Supplement: NIHMS1809638-supplement-supinfo.pdf [file NIHMS1809638-supplement-supinfo.pdf]

# ChemMedChem

Supporting Information

## **Identification of 4-Anilinoquin(az)oline as a Cell-Active Protein Kinase Novel 3 (PKN3) Inhibitor Chemotype\*\***

Christopher R. M. Asquith<sup>†,\*</sup>, Louisa Temme<sup>†</sup>, Michael P. East, Tuomo Laitinen, Julie Pickett, Frank E. Kwarcinski, Parvathi Sinha, Carrow I. Wells, Gary L. Johnson, Reena Zutshi, and David H. Drewry<sup>\*</sup>

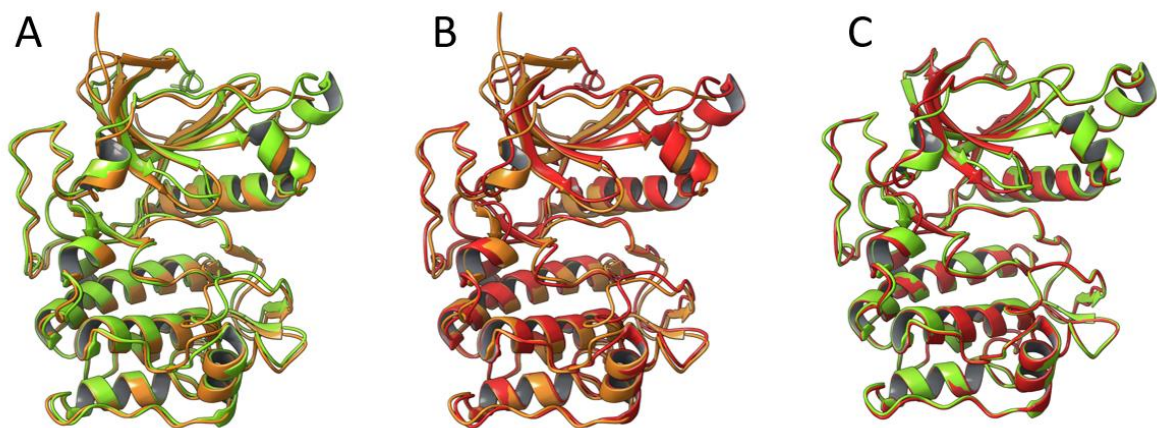

**Figure S1.** Structural Comparison of PKN family tyrosine kinases and homology model of PKN3 constructed in this study. Panel A: **PKN1** (orange cartoon, PDB:4OTD) vs. **PKN2** (green cartoon, PDB:4CRS). Panel: B **PKN3** model (red cartoon) vs **PKN1** (orange, PDB:4OTD). Panel C: **PKN3** model vs. **PKN2** (green cartoon, PDB:4CRD).
